# Supplementary material
Source: publisher figshare collection journal article supplement (https://brill.figshare.com/ndownloader/files/27899172)
Supplement: Supplementary file 1 [file 27899172]

**Supplementary Table S4.** Odour intensity scores and odour character noted in sensory evaluation from garlic cloves infected with *Ditylenchus destructor* and non-infected garlic cloves.

|  | | Panels | | | | | | | | | | Mean score | No. nematodes |
| --- | --- | --- | --- | --- | --- | --- | --- | --- | --- | --- | --- | --- | --- |
| Infected garlic | |  |  |  |  |  |  |  |  |  |  |  |  |
| 1 | Score | 5 | 6 | 8 | 7 | 4 | 9 | 10 |  |  |  | 7.000 | 5650 |
|  | Odour character | Sweet | Old garlic | Vegetable | Sweet | Vegetable | Sweet | Sweet |  |  |  |  |  |
| 2 | Score | 12 | 9.5 | 11 | 10 | 12 | 8 | 9 |  |  |  | 10.214 | 5000 |
|  | Odour character | New garlic | Old garlic | Vegetable | Chemical | Old garlic | Chemical | New garlic |  |  |  |  |  |
| 3 | Score | 8 | 6 | 3 | 3 | 1 | 4 | 8 |  |  |  | 4.714 | 21500 |
|  | Odour character | No odour | Vegetable | Vegetable | Sweet | Vegetable | Old garlic | New garlic |  |  |  |  |  |
| 4 | Score | 5 | 6 | 7 | 8 | 6 | 14 | 7 |  |  |  | 7.571 | 5500 |
|  | Odour character | snack | Old garlic | Vegetable | potato | Vegetable | Fishy | Sweet |  |  |  |  |  |
| 5 | Score | 5 | 6 | 4 | 6 | 7 | 3 | 5 |  |  |  | 5.143 | 12575 |
|  | Odour character | Sweet | Vegetable | Old garlic | Sweet | Old garlic | Old garlic | Old garlic |  |  |  |  |  |
| 6 | Score | 13 | 12 | 12 | 12 | 11 | 5 | 14 |  |  |  | 11.286 | 8175 |
|  | Odour character | New garlic | Old garlic | Old garlic | New garlic | Vegetable | Old garlic | Vegetable |  |  |  |  |  |
| 7 | Score | 9 | 6 | 10 | 4 | 10 | 15 | 6 |  |  |  | 8.571 | 13075 |
|  | Odour character | No odour | Old garlic | Sweet | Vegetable | Old garlic | Old garlic | Vegetable |  |  |  |  |  |
| 8 | Score | 11 | 13 | 14 | 14 | 9 | 11 | 13 |  |  |  | 12.143 | 15925 |
|  | Odour character | Fermented | Old garlic | New garlic | New garlic | Old garlic | Chemical | Chemical |  |  |  |  |  |
| 9 | Score | 15 | 15 | 15 | 15 | 15 | 13 | 15 |  |  |  | 14.714 | 6175 |
|  | Odour character | New garlic | New garlic | New garlic | New garlic | New garlic | New garlic | New garlic |  |  |  |  |  |
| 10 | Score | 14 | 14 | 13 | 11 | 14 | 12 | 12 |  |  |  | 12.857 | 14000 |
|  | Odour character | New garlic | New garlic | New garlic | New garlic | New garlic | New garlic | Vegetable |  |  |  |  |  |
| 11 | Score | 10 | 11 | 2 | 5 | 13 | 7 | 11 |  |  |  | 8.429 | 9175 |
|  | Odour character | Fermented | Old garlic | Sweet | Sweet | New garlic | New garlic | Vegetable |  |  |  |  |  |
| 12 | Score | 3 | 9.5 | 9 | 13 | 8 | 6 | 4 |  |  |  | 7.500 | 18750 |
|  | Odour character | No odour | Old garlic | Old garlic | Old garlic | New garlic | Old garlic | Vegetable |  |  |  |  |  |
| 13 | Score | 7 | 3 | 5 | 9 | 5 | 10 | 3 |  |  |  | 6.000 | 7425 |
|  | Odour character | Fermented | No odour | Vegetable | New garlic | Vegetable | Old garlic | Sweet |  |  |  |  |  |
| 14 | Score | 4 | 5 | 10 | 5 | 3 | 5 | 10 |  |  |  | 6.000 | 5133 |
|  | Odour character | Old garlic | Old garlic | Old garlic | Sweet | Vegetable | Old garlic | Fishy |  |  |  |  |  |
| 15 | Score | 10 | 12 | 11 | 11 | 10 | 13 | 6 |  |  |  | 10.429 | 53 |
|  | Odour character | Old garlic | Old garlic | Old garlic | New garlic | Vegetable | Fishy | Fishy |  |  |  |  |  |
| 16 | Score | 11 | 12 | 13 | 10 | 12 | 12 | 1 |  |  |  | 10.143 | 6 |
|  | Odour character | Old garlic | Old garlic | New garlic | New garlic | New garlic | Sweet | Sweet |  |  |  |  |  |
| 17 | Score | 3 | 5 | 5 | 6 | 4 | 3 | 2 |  |  |  | 4.000 | 44 |
|  | Odour character | Fishy | Old garlic | Fishy | Sweet | Old garlic | Old garlic | New garlic |  |  |  |  |  |
| 18 | Score | 13 | 5 | 9 | 12 | 7 | 11 | 9 |  |  |  | 9.429 | 0 |
|  | Odour character | New garlic | Old garlic | Fishy | New garlic | Old garlic | New garlic | New garlic |  |  |  |  |  |
| 19 | Score | 9 | 9 | 6 | 2 | 6 | 8 | 5 |  |  |  | 6.429 | 3266 |
|  | Odour character | Old garlic | Fishy | New garlic | Old garlic | New garlic | New garlic | Fishy |  |  |  |  |  |
| 20 | Score | 7 | 5 | 8 | 9 | 1 | 9 | 12 |  |  |  | 7.286 | 3 |
|  | Odour character | Fishy | Fishy | Vegetable | Sweet | Sweet | New garlic | Old garlic |  |  |  |  |  |
| 21 | Score | 15 | 15 | 14 | 14 | 14 | 15 | 14 |  |  |  | 14.429 | 18600 |
|  | Odour character | New garlic | New garlic | New garlic | New garlic | New garlic | Old garlic | New garlic |  |  |  |  |  |
| 22 | Score | 6 | 5 | 4 | 4 | 8 | 6 | 4 |  |  |  | 5.286 | 23 |
|  | Odour character | Old garlic | Fishy | Sweet | Sweet | Sweet | Sweet | Sweet |  |  |  |  |  |
| 23 | Score | 8 | 9 | 7 | 8 | 13 | 7 | 11 |  |  |  | 9.000 | 27 |
|  | Odour character | Old garlic | Old garlic | Vegetable | Sweet | Sweet | Old garlic | Old garlic |  |  |  |  |  |
| 24 | Score | 5 | 9 | 3 | 7 | 5 | 4 | 3 |  |  |  | 5.143 | 36 |
|  | Odour character | New garlic | Old garlic | Fishy | Old garlic | Vegetable | Vegetable | Old garlic |  |  |  |  |  |
| 25 | Score | 14 | 14 | 15 | 15 | 15 | 14 | 15 |  |  |  | 14.571 | 5533 |
|  | Odour character | New garlic | New garlic | New garlic | New garlic | Fishy | New garlic | New garlic |  |  |  |  |  |
| 26 | Score | 12 | 12 | 12 | 13 | 11 | 10 | 7 |  |  |  | 11.000 | 4200 |
|  | Odour character | Old garlic | Old garlic | Vegetable | New garlic | Vegetable | Old garlic | Fishy |  |  |  |  |  |
| 27 | Score | 8 | 9 | 8 | 9 | 4 | 8 | 8 | 4 | 9 | 9 | 7.600 | 47333 |
|  | Odour character | Old garlic | New garlic | New garlic | New garlic | Sweet | New garlic | Sweet | New garlic | New garlic | New garlic |  |  |
| 28 | Score | 8 | 7 | 9 | 8 | 9 | 9 | 9 | 9 | 7 | 8 | 8.300 | 77333 |
|  | Odour character | Old garlic | Old garlic | New garlic | Fishy | New garlic | New garlic | sulphur | New garlic | New garlic | Old garlic |  |  |
| 29 | Score | 2.5 | 2 | 5 | 2 | 2 | 2 | 0 | 2 | 0 | 0 | 1.750 | 90000 |
|  | Odour character | Vegetable | No odour | Sweet | Fishy | Sweet | No odour | No odour | Fishy | No odour | No odour |  |  |
| 30 | Score | 5 | 3 | 6 | 4 | 8 | 6 | 4 | 7 | 5 | 5 | 5.300 | 34667 |
|  | Odour character | Old garlic | Old garlic | Old garlic | New garlic | Fermented | Old garlic | Old garlic | Vegetable | New garlic | Old garlic |  |  |
| 31 | Score | 5 | 5 | 2 | 6 | 5 | 5 | 2 | 3 | 4 | 6 | 4.300 | 74000 |
|  | Odour character | New garlic | Fermented | Old garlic | Sweet | New garlic | Old garlic | New garlic | sulphur | Old garlic | Old garlic |  |  |
| 32 | Score | 5 | 6 | 7 | 7 | 6 | 3 | 7 | 5 | 8 | 7 | 6.100 | 82000 |
|  | Odour character | New garlic | New garlic | Old garlic | New garlic | Sweet | Fishy | New garlic | New garlic | New garlic | Fermented |  |  |
| 33 | Score | 8 | 4 | 3.5 | 5 | 7 | 7 | 5 | 8 | 6 | 4 | 5.750 | 98000 |
|  | Odour character | New garlic | Old garlic | Old garlic | Fishy | New garlic | New garlic | sulphur | Old garlic | New garlic | No odour |  |  |
| 34 | Score | 0.5 | 8 | 3.5 | 3 | 3 | 4 | 3 | 0 | 2 | 3 | 3.000 | ##### |
|  | Odour character | No odour | Old garlic | Old garlic | Sweet | New garlic | Old garlic | Sweet | No odour | Sweet | Sweet |  |  |
| 35 | Score | 8 | 8 | 8 | 8 | 8 | 7 | 8 | 8 |  |  | 7.857 | 6933 |
|  | Odour character | Old garlic | New garlic | Old garlic | New garlic | New garlic | Old garlic | New garlic | New garlic |  |  |  |  |
| 36 | Score | 3 | 6 | 2 | 6 | 6 | 5.5 | 3 | 2 |  |  | 4.500 | 89333 |
|  | Odour character | Fishy | Old garlic | Vegetable | Old garlic | Old garlic | Vegetable | Vegetable | Sweet |  |  |  |  |
| 37 | Score | 5 | 2 | 5 | 4 | 4 | 5.5 | 2 | 6 |  |  | 3.929 | 43333 |
|  | Odour character | Vegetable | Sweet | Vegetable | Sweet | Vegetable | Old garlic | Vegetable | Vegetable |  |  |  |  |
| 38 | Score | 6 | 3 | 6 | 3 | 3 | 4 | 6 | 5 |  |  | 4.429 | 39333 |
|  | Odour character | New garlic | Vegetable | Vegetable | Fermented | Vegetable | New garlic | Vegetable | Fishy |  |  |  |  |
| 39 | Score | 7 | 5 | 3 | 5 | 2 | 3 | 5 | 3 |  |  | 4.286 | 39333 |
|  | Odour character | New garlic | Sweet | Old garlic | Sweet | Sweet | Sweet | Sweet | Vegetable |  |  |  |  |
| 40 | Score | 2 | 4 | 4 | 2 | 5 | 2 | 4 | 4 |  |  | 3.286 | 71333 |
|  | Odour character | Vegetable | Sweet | New garlic | Fishy | Vegetable | New garlic | Vegetable | Sweet |  |  |  |  |
| 41 | Score | 9 | 9 | 9 | 9 | 9 | 8 | 9 | 9 |  |  | 8.857 | 1533 |
|  | Odour character | Old garlic | New garlic | Old garlic | New garlic | New garlic | New garlic | New garlic | Fishy |  |  |  |  |
| 42 | Score | 4 | 7 | 7 | 7 | 7 | 9 | 7 | 7 |  |  | 6.857 | 5000 |
|  | Odour character | Fishy | New garlic | New garlic | Old garlic | New garlic | New garlic | New garlic | New garlic |  |  |  |  |
| 43 | Score | 4.5 | 4 | 5 | 1 | 2 | 9 | 2 | 8 | 1 | 7 | 4.350 | 25333 |
|  | Odour character | Old garlic | Vegetable | Old garlic | No odour | Sweet | Fermented | No odour | Old garlic | Vegetable | Vegetable |  |  |
| 44 | Score | 8 | 4 | 7 | 6 | 6 | 4 | 4 | 2 | 6 | 8 | 5.500 | 533 |
|  | Odour character | Old garlic | Vegetable | New garlic | Sweet | Vegetable | Old garlic | Vegetable | Sweet | sulphur | New garlic |  |  |
| 45 | Score | 8 | 7 | 4 | 9 | 7 | 5 | 8 | 5 | 8 | 5 | 6.600 | 42000 |
|  | Odour character | Old garlic | Sweet | Fishy | Fishy | Sweet | Vegetable | New garlic | Vegetable | Old garlic | Sweet |  |  |
| 46 | Score | 4.5 | 4 | 3 | 5 | 3 | 7 | 6 | 4 | 5 | 4 | 4.550 | 16867 |
|  | Odour character | Fishy | Vegetable | Old garlic | Old garlic | Sweet | Vegetable | New garlic | Vegetable | Vegetable | Fishy |  |  |
| 47 | Score | 4.5 | 2 | 6 | 3 | 5 | 3 | 5 | 7 | 7 | 6 | 4.850 | 4533 |
|  | Odour character | Old garlic | sulphur | Old garlic | Vegetable | Fishy | Old garlic | Old garlic | Old garlic | Old garlic | Vegetable |  |  |
| 48 | Score | 4.5 | 9 | 8 | 4 | 9 | 8 | 7 | 6 | 4 | 3 | 6.250 | 3467 |
|  | Odour character | Old garlic | New garlic | New garlic | New garlic | New garlic | Old garlic | New garlic | Old garlic | Vegetable | sulphur |  |  |
| 49 | Score | 8 | 8 | 9 | 8 | 8 | 6 | 9 | 9 | 9 | 9 | 8.300 | 2533 |
|  | Odour character | Old garlic | Old garlic | New garlic | Old garlic | New garlic | Fermented | Old garlic | Old garlic | Fermented | New garlic |  |  |
| 50 | Score | 2 | 0 | 1 | 2 | 1 | 0 | 1 | 1 | 3 | 0 | 1.100 | 19333 |
|  | Odour character | No odour | No odour | No odour | No odour | Vegetable | No odour | No odour | New garlic | No odour | Fishy |  |  |
|  |  |  |  |  |  |  |  |  |  |  |  |  |  |
|  | |  | | | | | | | | | |  |  |
| Non-infected garlic | |  | | | | | | | | | |  |  |
| 1 | Score | 2 | 2 | 6 | 2 | 0 | 0 | 2 |  |  |  | 2.00 | 0 |
|  | Odour character | Vegetable | Old garlic | Vegetable | Sweet | No odour | Old garlic | Sweet |  |  |  |  |  |
| 2 | Score | 1 | 0 | 1 | 1 | 3 | 2 | 1 |  |  |  | 1.29 | 0 |
|  | Odour character | Vegetable | Vegetable | Vegetable | No odour | Old garlic | dust | Vegetable |  |  |  |  |  |
| 3 | Score | 0 | 1 | 0 | 0 | 2 | 1 | 0 |  |  |  | 0.57 | 0 |
|  | Odour character | No odour | Vegetable | Sweet | No odour | Vegetable | Vegetable | Vegetable |  |  |  |  |  |
| 4 | Score | 0 | 1 | 0 | 0 | 0 | 0 | 0 |  |  |  | 0.14 | 0 |
|  | Odour character | No odour | Vegetable | Sweet | No odour | No odour | Old garlic | No odour |  |  |  |  |  |
| 5 | Score | 1 | 2 | 2 | 1 | 2 | 1 | 8 |  |  |  | 2.43 | 0 |
|  | Odour character | No odour | Fishy | Sweet | Sweet | Sweet | Sweet | Sweet |  |  |  |  |  |
| 6 | Score | 2 | 0 | 1 | 3 | 9 | 2 | 13 |  |  |  | 4.29 | 0 |
|  | Odour character | Sweet | Fishy | Sweet | Sweet | Sweet | Sweet | Sweet |  |  |  |  |  |
| 7 | Score | 2.5 | 0 | 1 | 1 | 1 | 1 | 6 | 1 | 1 | 2 | 1.79 | 0 |
|  | Odour character | Fishy | Sweet | Vegetable | Fermented | No odour | Vegetable | Fermented | No odour | No odour | No odour |  |  |
| 8 | Score | 0.5 | 1 | 0 | 0 | 0 | 0 | 1 | 6 | 3 | 1 | 0.36 | 0 |
|  | Odour character | Vegetable | No odour | No odour | Sweet | No odour | Vegetable | No odour | Fermented | Old garlic | No odour |  |  |
| 9 | Score | 1 | 1 | 0 | 0 | 0 | 0 | 0 | 1 |  |  | 0.29 | 0 |
|  | Odour character | No odour | No odour | No odour | No odour | No odour | No odour | Vegetable | No odour |  |  |  |  |
| 10 | Score | 0 | 0 | 1 | 1 | 1 | 1 | 1 | 0 |  |  | 0.71 | 0 |
|  | Odour character | No odour | No odour | New garlic | No odour | Fishy | No odour | Sweet | No odour |  |  |  |  |
| 11 | Score | 1 | 6 | 2 | 7 | 4 | 2 | 3 | 3 | 0 | 2 | 3.57 | 0 |
|  | Odour character | No odour | Sweet | Sweet | Sweet | Sweet | Old garlic | Sweet | Vegetable | Sweet | Vegetable |  |  |
| 12 | Score | 0 | 1 | 0 | 0 | 0 | 1 | 0 | 0 | 2 | 1 | 0.29 | 0 |
|  | Odour character | No odour | No odour | No odour | No odour | No odour | Sweet | No odour | New garlic | No odour | Fermented |  |  |
